# Supplementary material for: One step microwave-hydrothermal synthesis of rGO–TiO2nanocomposites for enhanced electrochemical oxygen evolution reaction
Source: Royal Society of Chemistry journal article supplement (doi:10.1039/d0nj01475c), 2020-01-01
Supplement: d0nj01475c1.pdf [file d0nj01475c1.pdf]

## Supplementary information

### One step microwave-hydrothermal synthesis of rGO-TiO<sub>2</sub> nanocomposites for enhanced electrochemical oxygen evolution reaction

Fernanda C. Romeiro, Samuel C. Silva, Edson Nossol, Renata C. Lima\*

Instituto de Química, Universidade Federal de Uberlândia, 38400-902, Uberlândia, MG, Brazil, \*rclima@ufu.br, +55-34-3239-4143

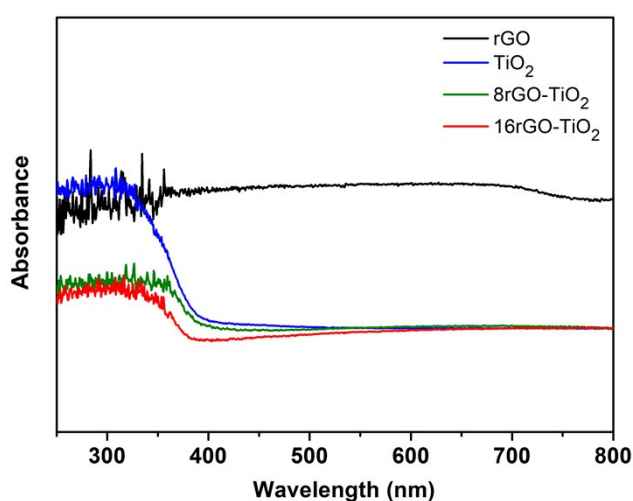

Figure S1. Optical absorption spectra of rGO, TiO<sub>2</sub> and rGO-TiO<sub>2</sub> samples.

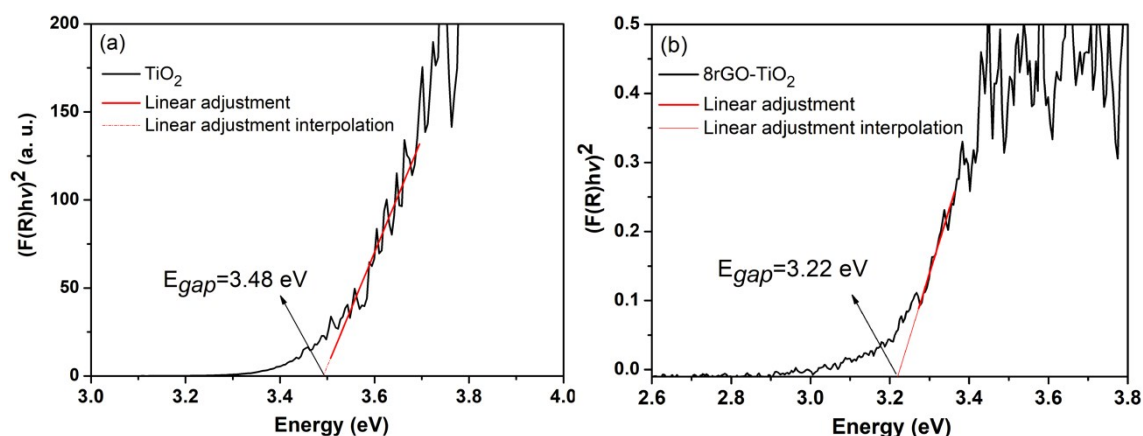

Figure S2. The plot of transformed Kubelka-Munk function  $(F(R)hv)^2$  versus energy (eV) for pure (a) TiO<sub>2</sub> and (b) 8rGO-TiO<sub>2</sub> nanocomposite.

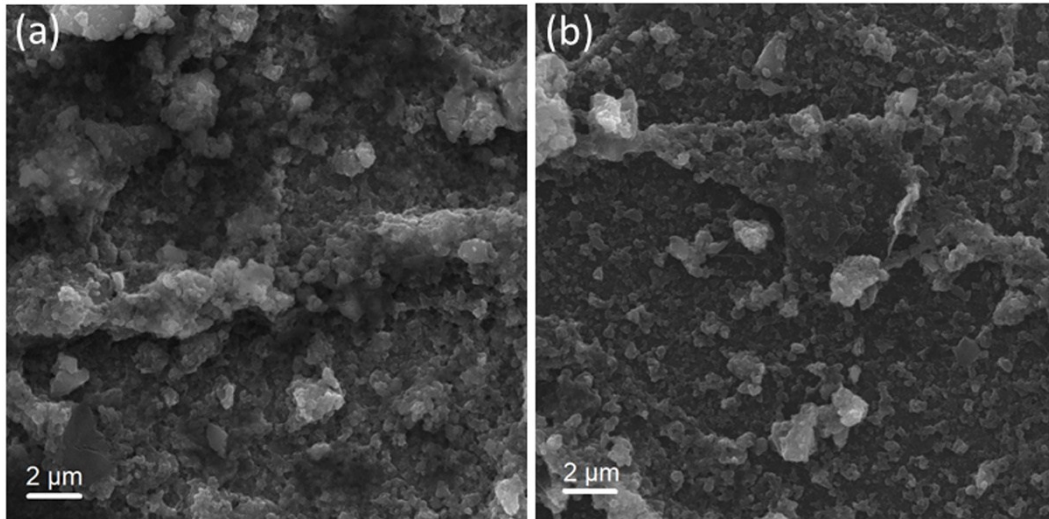

Figure S3. SEM images (a) before and (b) after the chronoamperometric test (4 h) for 16rGO-TiO<sub>2</sub> nanocomposite film.

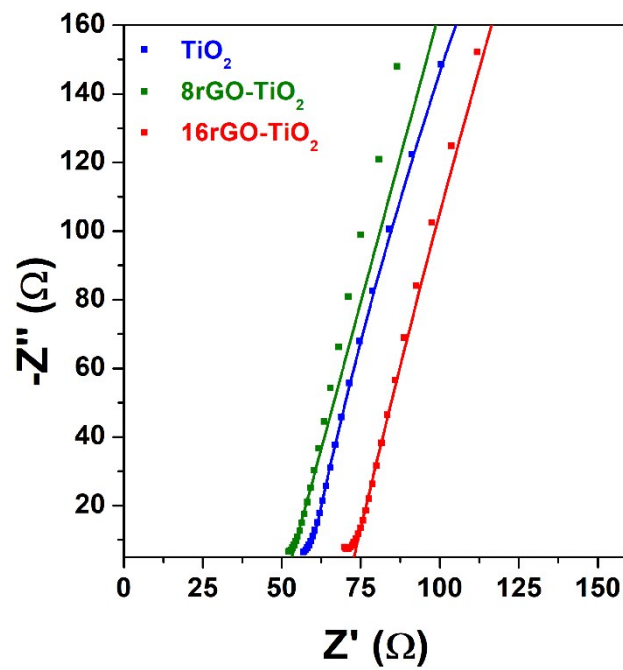

Figure S4. EIS measurements of pure TiO<sub>2</sub>, 8rGO-TiO<sub>2</sub> and 16rGO-TiO<sub>2</sub> nanocomposites.

Table S1. Comparison of catalysts activities in OER.

| Catalyst                       | Tafel slope (mV dec <sup>-1</sup> ) at neutral pH | Tafel slope (mV dec <sup>-1</sup> ) at alkaline pH | REF       |
|--------------------------------|---------------------------------------------------|----------------------------------------------------|-----------|
| 16rGO-TiO <sub>2</sub>         | 138 (pH=7.0)                                      | 76 (pH=14.0)                                       | This work |
| CeO <sub>2</sub> /rGO          | -                                                 | 138 (~pH=13)                                       | 18        |
| Pure TiO <sub>2</sub>          | -                                                 | 230 (pH=13.7)                                      | 59        |
| Modified TiO <sub>2</sub> -700 | -                                                 | 51 (pH=13.7)                                       | 59        |
| rGO-TiO <sub>2</sub> (RAG3)    | -                                                 | 94, (pH=14.0)                                      | 60        |
| Nickel-borate/rGO              | 176 (pH=9.2)                                      | 79 (pH=14)                                         | 64        |
| WO <sub>3</sub> /CC            | -                                                 | 82 (pH=14)                                         | 65        |
| TiO <sub>2</sub> /B-C/B4C      | -                                                 | 61 (~pH=13)                                        | 66        |
